# Supplementary material
Source: HighWire-hosted journal article supplement (https://bmjopen.bmj.com/content/8/7/e022089)
Supplement: inline-supplementary-material-1 [file inline-supplementary-material-1.pdf]

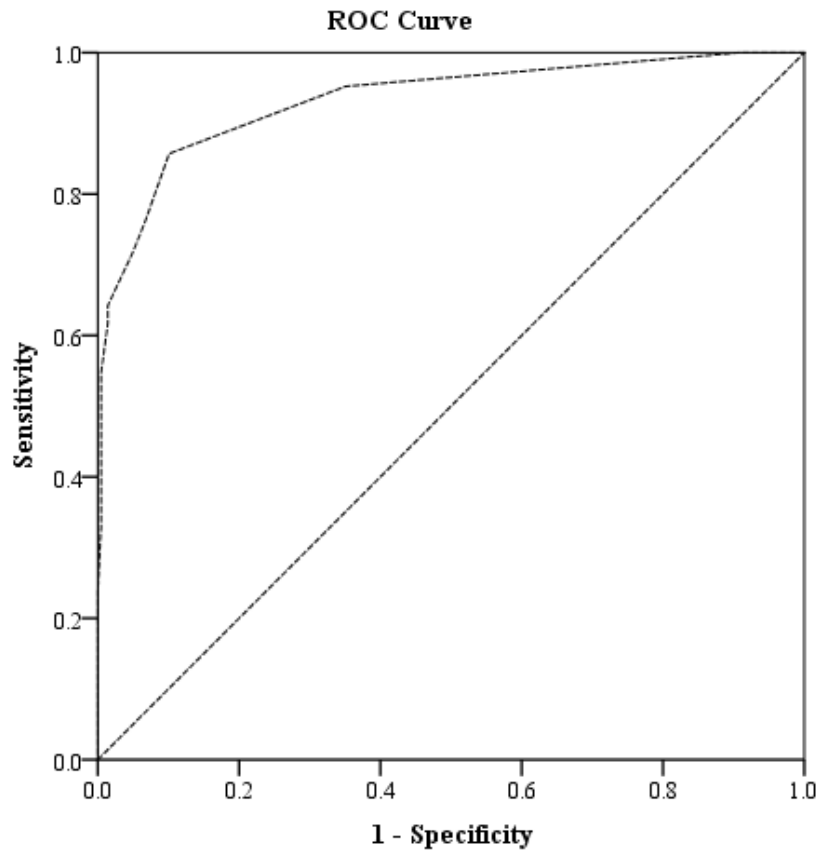

Diagonal segments are produced by ties.

### Supplementary Figure 1

The percentage of false-positive results (100-specificity) plotted against the percentage of true-positive results (sensitivity) across the entire range of breath CO measures.

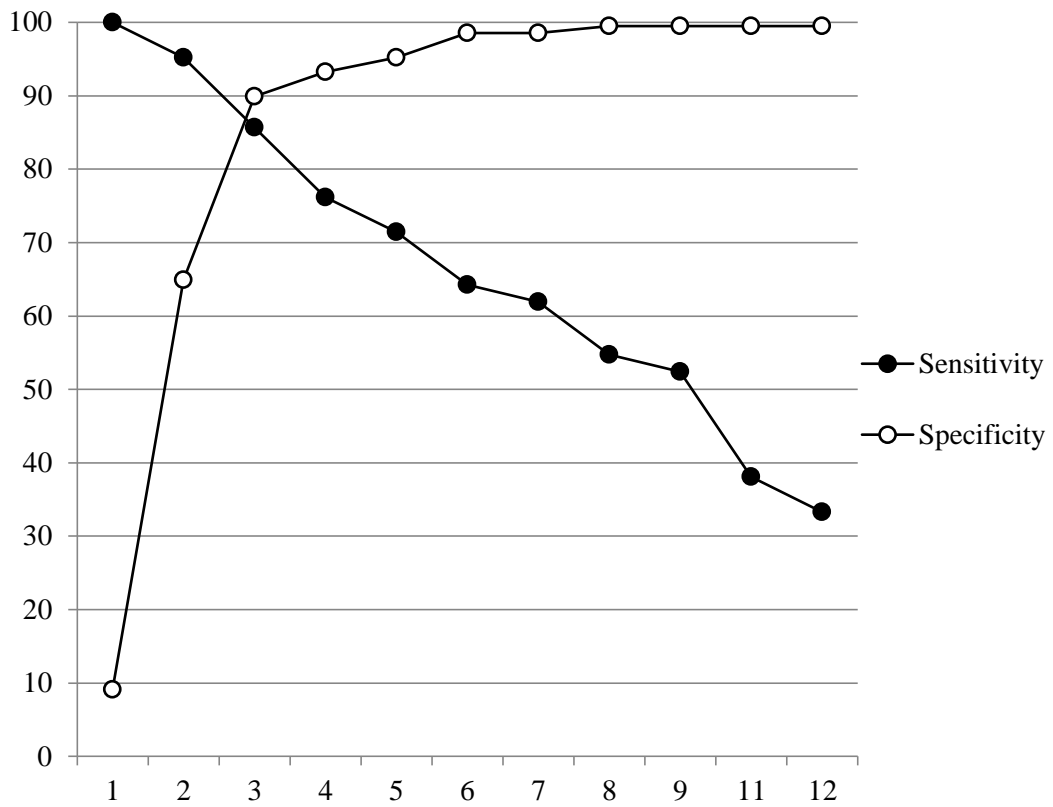

**Supplementary Figure 2**

Sensitivity and specificity were plotted at BCO cut-off levels from 1 to 12 ppm. Sensitivity is the percentage of positive carbon monoxide breath tests at a specified cut-off. Specificity is the percentage of negative carbon monoxide breath tests at a specified cut-off.

**Supplementary Table 1.** Sensitivity and specificity of the carbon monoxide analyser at various carbon monoxide breath test levels.

| Carbon monoxide (ppm) | Sensitivity | Specificity | 1-Specificity | Sensitivity + Specificity |
|-----------------------|-------------|-------------|---------------|---------------------------|
| 1                     | 1           | 0.09        | 0.91          | 1.09                      |
| 2                     | 0.95        | 0.65        | 0.35          | 1.60                      |
| <b>3</b>              | <b>0.86</b> | <b>0.90</b> | <b>0.10</b>   | <b>1.76</b>               |
| 4                     | 0.76        | 0.93        | 0.07          | 1.69                      |
| 5                     | 0.71        | 0.95        | 0.05          | 1.67                      |
| 6                     | 0.64        | 0.99        | 0.01          | 1.63                      |
| 7                     | 0.62        | 0.99        | 0.01          | 1.60                      |
| 8                     | 0.55        | 1.00        | 0.00          | 1.54                      |
| 9                     | 0.52        | 1.00        | 0.00          | 1.52                      |
| 11                    | 0.38        | 1.00        | 0.00          | 1.38                      |
| 12                    | 0.33        | 1.00        | 0.00          | 1.33                      |

**Supplementary Table 2.** Correlations between maternal carbon monoxide levels (ppm) and factors associated with carbon monoxide exposure.

|                                                  | n   | Correlation co-efficient<br>(rho) | p-value |
|--------------------------------------------------|-----|-----------------------------------|---------|
| Self-reported number of cigarettes per day       | 250 | 0.61                              | <0.001  |
| Time since last cigarette (hours) <sup>a</sup>   | 39  | -0.51                             | <0.01   |
| Partners BCO                                     | 54  | 0.34                              | <0.05   |
| Partners BCO <sup>b</sup>                        | 45  | 0.19                              | NS      |
| Passive smoking exposure (hours)                 | 70  | 0.31                              | <0.01   |
| Passive smoke exposure only (hours) <sup>b</sup> | 38  | -0.06                             | NS      |

<sup>a</sup> missing data n=3

<sup>b</sup> excluded active maternal smokers from analysis

**Supplementary Table 3.** Changes self-reported smoking status of the study cohort.

| Smoking status research questionnaire | Smoking status at first antenatal visit |                    |                         | Total<br>% (n) |
|---------------------------------------|-----------------------------------------|--------------------|-------------------------|----------------|
|                                       | Never smoked<br>% (n)                   | Ex-smoker<br>% (n) | Current smoker<br>% (n) |                |
| Never smoked                          | 84% (96)                                | 9% (9)             | 0% (0)                  | 42% (105)      |
| Ex-smoker                             | 16% (19)                                | 85% (82)           | 5% (2)                  | 41% (103)      |
| Current smoker                        | 0% (0)                                  | 6% (6)             | 95% (36)                | 17% (42)       |
| Total                                 | 100% (115)                              | 100% (97)          | 100% (38)               | 100% (250)     |
